# Supplementary material
Source: PubMed Central journal article supplement (PMC5149419)
Supplement: NIHMS834298-supplement-Supporting_Information.pdf [file NIHMS834298-supplement-Supporting_Information.pdf]

## Supporting Information

### **Structural Polymorphism of Alzheimer's $\beta$ -Amyloid Fibrils as Controlled by an E22 Switch: A Solid-State NMR Study**

Matthew R. Elkins <sup>1§</sup>, Tuo Wang <sup>1§</sup>, Mimi Nick <sup>2</sup>, Hyunil Jo <sup>2</sup>, Thomas Lemmin <sup>2</sup>, Stanley B. Prusiner <sup>3</sup>, William F. DeGrado <sup>2</sup>, Jan Stöhr <sup>3</sup> and Mei Hong <sup>1\*</sup>

<sup>1</sup> Department of Chemistry, Massachusetts Institute of Technology, Cambridge, MA 02139

<sup>2</sup> Department of Pharmaceutical Chemistry, University of California, San Francisco, San Francisco, CA 94158

<sup>3</sup> Institute for Neurodegenerative Diseases, Department of Neurology, University of California, San Francisco, San Francisco, CA 94143

<sup>§</sup> These authors contributed equally to this work.

\* Corresponding author: Mei Hong, Email: meihong@mit.edu

**Table S1.**  $^{13}\text{C}$  and  $^{15}\text{N}$  chemical shifts (ppm) of the Arctic A $\beta$ 40 from 2D  $^{13}\text{C}$ - $^{13}\text{C}$  and  $^{15}\text{N}$ - $^{13}\text{C}$  correlation spectra.  $^{15}\text{N}$  chemical shifts are referenced to liquid ammonia. All  $^{13}\text{C}$  chemical shifts are referenced to DSS.

| Site    | $^{15}\text{N}$ | C'    | C $\alpha$ | C $\beta$ | C $\gamma$ / $\gamma$ 1 | C $\gamma$ 2 | C $\delta$ /C $\delta$ 1 | C $\delta$ 2 |
|---------|-----------------|-------|------------|-----------|-------------------------|--------------|--------------------------|--------------|
| F19 I   | 131.3           | 174.4 | 58.9       | 40.1      | 138.8                   |              | 130.8/130.3              |              |
| F19 II  | 132.3           | 174.7 | 58.8       | 39.3      |                         |              |                          |              |
| A21 I   | 124.7           | 177.4 | 52.6       | 19.8      |                         |              |                          |              |
| A21 II  | 124.7           | 176.1 | 52.6       | 19.8      |                         |              |                          |              |
| A21 III | 125.4           | 176.9 | 53.2       | 18.5      |                         |              |                          |              |
| I32 I   | 127.1           | 174.3 | 60.0       | 40.5      | 27.5                    | 19.0         | 14.4                     |              |
| I32 II  | 127.8           | 174.0 | 59.2       | 42.2      | 27.5                    | 17.2         | 14.8                     |              |
| I32 III | 126.8           | 176.0 | 57.8       | 41.5      | 27.1                    | 17.5         | 13.8                     |              |
| I32 IV  |                 |       |            | 42.7      | 26.5                    |              |                          |              |
| L34 I   | 111.5           | 178.3 | 56.3       | 42.2      | 27.5                    |              | 26.1                     | 20.9         |
| L34 II  | 126.5           | 175.3 | 55.0       | 42.1      | 29.7                    |              | 26.0                     | 23.0         |
| L34 III | 121.2           | 176.2 | 55.1       | 45.6      | 27.0                    |              | 25.8                     |              |
| L34 IV  |                 |       | 53.6       | 46.2      | 27.5                    |              |                          |              |
| V36 I   | 120.9           | 175.8 | 54.5       | 35.9      | 21.8                    | 19.6         |                          |              |
| V36 II  | 123.1           | 175.8 | 59.7       | 36.7      | 21.9                    | 19.8         |                          |              |
| V36 III | 123.5           | 175.8 | 59.9       | 37.3      | 22.1                    | 20.0         |                          |              |
| G38 I   | 109.5           | 170.1 | 43.7       |           |                         |              |                          |              |
| G38 II  | 106.5           | 170.0 | 45.5       |           |                         |              |                          |              |
| G38 III | 107.5           | 170.1 | 47.0       |           |                         |              |                          |              |
| G38 IV  | 105.0           | 171.1 | 46.1       |           |                         |              |                          |              |

**Table S2.**  $^{13}\text{C}$  and  $^{15}\text{N}$  chemical shift (ppm) comparison of Arctic fibrils with other A $\beta$  strains from literature. The Arctic chemical shifts are obtained from 50 ms  $^{13}\text{C}$ - $^{13}\text{C}$  DARR and  $^{15}\text{N}$ - $^{13}\text{C}$  HETCOR spectra. All  $^{13}\text{C}$  chemical shifts are referenced to DSS and all  $^{15}\text{N}$  chemical shifts are referenced to liquid ammonia.

| Site       | Reference              | A $\beta$ sample | $^{15}\text{N}$ | C'    | C $\alpha$ | C $\beta$ | C $\gamma$ /C $\gamma$ 1 | C $\gamma$ 2 | C $\delta$ /C $\delta$ 1 | C $\delta$ 2 | C $\epsilon$ /C $\epsilon$ 1 | C $\zeta$ |
|------------|------------------------|------------------|-----------------|-------|------------|-----------|--------------------------|--------------|--------------------------|--------------|------------------------------|-----------|
| <b>F19</b> | Petkova <sup>1</sup>   | WT               |                 | 171.9 | 56.5       | 42.6      |                          |              |                          |              |                              |           |
|            | Paravastu <sup>2</sup> | WT               |                 | 173.0 | 56.4       | 42.5      | 138.5                    |              | 131.0                    |              | 130.0                        | 127.3     |
|            | Lu <sup>3</sup>        | WT               | 128.2           | 174.5 | 54.6       | 41.5      | 142.2                    |              | 130.2                    |              |                              |           |
|            | Elkins <sup>4</sup>    | WT               | 130.1           | 172.6 | 56.2       | 42.9      | 139.2                    |              |                          |              |                              |           |
|            | Colvin <sup>5</sup>    | WT42             | 130.4           | 174.4 | 59.9       | 40.3      | 139.6                    |              | 130.5                    |              | 129.7                        |           |
|            | Xiao <sup>6</sup>      | WT42             | 130.2           | 174.9 | 60.8       | 41.1      | 139.7                    |              | 130.5                    |              | 130.5                        | 128.0     |
|            | Elkins                 | Arctic I         | 131.3           | 174.4 | 58.9       | 40.1      | 138.8                    |              | 130.8,130.3              |              |                              |           |
|            | Elkins                 | Arctic II        | 132.3           | 174.7 | 58.8       | 39.3      |                          |              |                          |              |                              |           |
|            | Schütz <sup>7</sup>    | Osaka            | 129.5           | 174.2 | 55.6       | 42.4      | 142.6                    |              | 130.6                    |              | 131.5                        | 128.9     |
|            | Elkins                 | Osaka DMSO       | 129.6           | 174.3 | 55.5       | 42.6      | 142.0                    |              | 129.8                    |              |                              |           |
|            | Elkins                 | Osaka NaOH       | 130.9           | 171.1 | 56.2       | 42.4      | 136.9                    |              | 129.9                    |              |                              |           |
| <b>A21</b> | Petkova                | WT               |                 | 175.0 | 50.1       | 22.7      |                          |              |                          |              |                              |           |
|            | Paravastu              | WT               |                 | 175.4 | 50.0       | 22.4      |                          |              |                          |              |                              |           |
|            | Lu                     | WT               | 117.0           | 176.3 | 57.0       | 18.5      |                          |              |                          |              |                              |           |
|            | Elkins                 | WT               | 131.4           | 174.2 | 49.9       | 20.9      |                          |              |                          |              |                              |           |
|            | Colvin                 | WT-42            | 123.5           | 176.7 | 52.3       | 20.3      |                          |              |                          |              |                              |           |
|            | Xiao                   | WT-42            | 124.2           | 177.3 | 53.2       | 20.8      |                          |              |                          |              |                              |           |
|            | Elkins                 | Arctic I         | 124.7           | 177.4 | 52.6       | 19.8      |                          |              |                          |              |                              |           |
|            | Elkins                 | Arctic II        | 124.7           | 176.1 | 52.6       | 19.8      |                          |              |                          |              |                              |           |
|            | Elkins                 | Arctic III       | 125.4           | 176.9 | 53.2       | 18.5      |                          |              |                          |              |                              |           |
|            | Schütz                 | Osaka            | 115.1           | 177.2 | 49.0       | 23.2      |                          |              |                          |              |                              |           |
|            | Elkins                 | Osaka DMSO       | 114.9           | 177.4 | 49.0       | 23.2      |                          |              |                          |              |                              |           |
|            | Elkins                 | Osaka NaOH       | 128.9           | 172.7 | 49.6       | 19.4      |                          |              |                          |              |                              |           |

| Site       | Reference  | A $\beta$ sample | <sup>15</sup> N | C'    | Ca    | C $\beta$ | C $\gamma$ /C $\gamma$ 1 | C $\gamma$ 2 | C $\delta$ /C $\delta$ 1 | C $\delta$ 2 | C $\epsilon$ /C $\epsilon$ 1 | C $\zeta$ |
|------------|------------|------------------|-----------------|-------|-------|-----------|--------------------------|--------------|--------------------------|--------------|------------------------------|-----------|
| <b>I32</b> | Petkova    | WT               |                 | 174.8 | 58.2  | 42.4      |                          |              |                          |              |                              |           |
|            | Paravastu  | WT               |                 | 176.0 | 57.5  | 42.7      | 27.3                     | 17.5         | 14.4                     |              |                              |           |
|            | Lu         | WT               | 124.7           | 175.9 | 58.5  | 41.1      | 27.1                     | 16.5         | 14.7                     |              |                              |           |
|            | Elkins     | WT               | 126.7           | 176.6 | 57.9  | 41.8      | 27.2                     | 17.8         | 15.1                     |              |                              |           |
|            | Colvin     | WT42             | 125.7           | 174.1 | 59.7  | 43.0      | 27.3                     | 18.6         | 14.1                     |              |                              |           |
|            | Xiao       | WT42             | 126.5           | 174.3 | 60.3  | 41.5      | 27.8                     | 18.7         | 14.4                     |              |                              |           |
|            | Elkins     | Arctic I         | 127.1           | 174.3 | 60.0  | 40.5      | 27.5                     | 19.0         | 14.4                     |              |                              |           |
|            | Elkins     | Arctic II        | 127.8           | 174.0 | 59.2  | 42.2      | 27.5                     | 17.2         | 14.8                     |              |                              |           |
|            | Elkins     | Arctic III       | 126.8           | 176.0 | 57.8  | 27.5      | 27.1                     | 17.5         | 13.8                     |              |                              |           |
|            | Schütz     | Osaka            | 125.3           | 175.7 | 58.4  | 41.7      | 27.4                     | 17.2         | 14.3                     |              |                              |           |
|            | Elkins     | Osaka DMSO       | 125.2           | 176.2 | 58.4  | 41.7      | 27.2                     | 17.3         | 14.3                     |              |                              |           |
|            | Elkins     | Osaka NaOH       | 125.2           | 174.9 | 56.7  | 41.3      | 25.9                     | 17.2         | 13.7,13.5                |              |                              |           |
| <b>L34</b> | Petkova    | WT               |                 | 173.5 | 53.8  | 45.9      |                          |              |                          |              |                              |           |
|            | Paravastu  | WT               |                 | 173.5 | 54.5  | 46.1      | 27.5                     |              | 25.4                     | 23.1         |                              |           |
|            | Lu         | WT               | 123.0           | 173.8 | 54.2  | 45.2      | 27.7                     |              | 25.9                     | 24.0         |                              |           |
|            | Elkins     | WT               | 123.2           | 173.8 | 54.5  | 48.0      | 29.0                     |              | 27.3                     | 24.3         |                              |           |
|            | Colvin     | WT42             | 110.7           | 178.3 | 56.7  | 41.7      | 27.1                     |              | 26.0                     | 20.9         |                              |           |
|            | Xiao       | WT42             | 111.5           | 178.6 | 57.4  | 42.1      | 26.9                     |              | 24.6                     | 21.7         |                              |           |
|            | Elkins     | Arctic I         | 111.5           | 178.3 | 56.3  | 42.2      | 27.5                     |              | 26.1                     | 20.9         |                              |           |
|            | Elkins     | Arctic II        | 126.5           | 178.0 | 55.0  | 42.1      | 29.7                     |              | 26.0                     | 23.0         |                              |           |
|            | Schütz     | Osaka            | 125.5           | 173.8 | 54.1  | 45.8      | 28.1                     |              | 25.6                     | 24.9         |                              |           |
|            | Elkins     | Osaka DMSO       | 125.1           | 173.8 | 54.3  | 46.0      | 28.2                     |              | 25.7                     | 24.9         |                              |           |
|            | Elkins     | Osaka NaOH       | 124.4           | 172.0 | 52.9  | 44.8      | 27.6                     |              | 25.1                     | 23.5         |                              |           |
|            | <b>V36</b> | Petkova          | WT              | 124.3 | 175.2 | 59.7      | 34.9                     |              |                          |              |                              |           |
| Paravastu  |            | WT               |                 | 174.6 | 59.4  | 34.9      | 20.9                     | 19.4         |                          |              |                              |           |
| Lu         |            | WT               | 125.2           | 175.8 | 58.9  | 35.0      | 20.9                     | 19.6         |                          |              |                              |           |
| Elkins     |            | WT               | 128.3           | 175.4 | 60.8  | 33.4      | 21.6                     | 21.1         |                          |              |                              |           |
| Elkins     |            | WT II            | 128.0           | 175.8 | 67.6  | 29.0      | 24.1                     | 22.7         |                          |              |                              |           |

| Site | Reference | A $\beta$ sample | $^{15}\text{N}$ | C'    | C $\alpha$ | C $\beta$ | C $\gamma$ /C $\gamma$ 1 | C $\gamma$ 2 | C $\delta$ /C $\delta$ 1 | C $\delta$ 2 | C $\epsilon$ /C $\epsilon$ 1 | C $\zeta$ |
|------|-----------|------------------|-----------------|-------|------------|-----------|--------------------------|--------------|--------------------------|--------------|------------------------------|-----------|
| V36  | Colvin    | WT42             | 124.6           | 174.7 | 60.2       | 34.5      | 21.2                     | 19.5         |                          |              |                              |           |
|      | Xiao      | WT42             | 124.4           | 175.2 | 60.9       | 34.8      | 21.7                     | 19.9         |                          |              |                              |           |
|      | Elkins    | Arctic I         | 120.9           | 175.8 | 58.5       | 35.9      | 21.8                     | 19.6         |                          |              |                              |           |
|      | Elkins    | Arctic II        | 123.1           | 175.8 | 59.7       | 36.7      | 21.9                     | 19.8         |                          |              |                              |           |
|      | Elkins    | Arctic III       | 123.5           | 175.8 | 59.9       | 37.3      | 22.1                     | 20.0         |                          |              |                              |           |
|      | Schütz    | Osaka            | 125.4           | 176.2 | 58.7       | 36.1      | 21.7                     |              |                          |              |                              |           |
|      | Elkins    | Osaka DMSO       | 125.6           | 176.3 | 58.9       | 35.8      | 21.8                     | 21.3         |                          |              |                              |           |
|      | Elkins    | Osaka NaOH       | 127.3           | 173.8 | 59.6       | 32.7      | 20.7                     | 19.9         |                          |              |                              |           |
| G38  | Petkova   | WT               | 104.2           | 170.4 | 44.8       |           |                          |              |                          |              |                              |           |
|      | Paravastu | WT               |                 | 171.1 | 45.0       |           |                          |              |                          |              |                              |           |
|      | Lu        | WT               | 106.0           | 169.8 | 44.9       |           |                          |              |                          |              |                              |           |
|      | Elkins    | WT               | 106.5           | 170.8 | 46.8       |           |                          |              |                          |              |                              |           |
|      | Colvin    | WT42             | 110.8           | 174.3 | 48.2       |           |                          |              |                          |              |                              |           |
|      | Xiao      | WT42             | 113.6           | 173.5 | 48.8       |           |                          |              |                          |              |                              |           |
|      | Elkins    | Arctic I         | 109.5           | 170.1 | 43.7       |           |                          |              |                          |              |                              |           |
|      | Elkins    | Arctic II        | 106.5           | 170.0 | 45.5       |           |                          |              |                          |              |                              |           |
|      | Elkins    | Arctic III       | 107.5           | 170.1 | 47.0       |           |                          |              |                          |              |                              |           |
|      | Elkins    | Arctic IV        | 105.0           | 171.1 | 46.1       |           |                          |              |                          |              |                              |           |
|      | Schütz    | Osaka            | 105.7           | 169.8 | 45.0       |           |                          |              |                          |              |                              |           |
|      | Elkins    | Osaka DMSO       | 105.8           | 169.9 | 45.0       |           |                          |              |                          |              |                              |           |
|      | Elkins    | Osaka NaOH       | 104.7           | 170.3 | 44.0       |           |                          |              |                          |              |                              |           |

1. Petkova *et al.* 2006 –  $^{13}\text{C}$  chemical shifts obtained from DSS-referenced values deposited for PDB accession code 2LMN <sup>1</sup>.
2. Paravastu *et al.* 2008 –  $^{13}\text{C}$  chemical shifts obtained by adding 2.0 ppm to TMS-referenced values in paper <sup>2</sup>.
3. Lu *et al.* 2013 –  $^{13}\text{C}$  chemical shifts obtained from DSS-referenced values in paper <sup>3</sup>.
4. Elkins –  $^{13}\text{C}$  chemical shifts referenced on the DSS scale.
5. Colvin *et al.* 2015 –  $^{13}\text{C}$  chemical shifts obtained from DSS-referenced values in paper <sup>4</sup>.
6. Xiao *et al.* 2015 –  $^{13}\text{C}$  chemical shifts obtained by adding 2.0 ppm to TMS-referenced values in paper <sup>5</sup>.
7. Schutz *et al.* 2015 –  $^{13}\text{C}$  chemical shifts obtained from DSS-referenced values deposited for PDB accession code 2MVX <sup>6</sup>.

**Table S3.**  $^1\text{H}$   $T_{1\rho}$  relaxation times of A $\beta$  samples measured with a 62.5 kHz spin-lock field. The curves are fit using single and double exponential functions  $I(t) = e^{-t/T_{1\rho,b}}$  and  $I(t) = ae^{-t/T_{1\rho,a}} + be^{-t/T_{1\rho,b}}$ , where  $b = 1-a$ .  $^{13}\text{C}$  chemical shifts are referenced to DSS.

| <b>Arctic DMSO, 298 K</b>     |                |                    |                    |                 |                 |
|-------------------------------|----------------|--------------------|--------------------|-----------------|-----------------|
| Carbon                        | $\delta$ (ppm) | $T_{1\rho,a}$ (ms) | $T_{1\rho,b}$ (ms) | $a$             | $b$             |
| F19I32V36a                    | 59.0           | 2.9 $\pm$ 0.6      | 47 $\pm$ 3         | 0.22 $\pm$ 0.22 | 0.78 $\pm$ 0.22 |
| F19b                          | 40.1           | 3.1 $\pm$ 0.7      | 42 $\pm$ 3         | 0.23 $\pm$ 0.03 | 0.77 $\pm$ 0.03 |
| F19R                          | 130.9          | 5 $\pm$ 3          | 35 $\pm$ 10        | 0.49 $\pm$ 0.18 | 0.51 $\pm$ 0.18 |
| A21a                          | 52.7           | 2.5 $\pm$ 0.5      | 24 $\pm$ 1         | 0.18 $\pm$ 0.02 | 0.82 $\pm$ 0.02 |
| I32d                          | 14.7           |                    | 68 $\pm$ 2         |                 | 1               |
| L34a                          | 55.0           | 4.2 $\pm$ 0.6      | 47 $\pm$ 4         | 0.35 $\pm$ 0.03 | 0.65 $\pm$ 0.03 |
| L34d2                         | 23.0           | 5 $\pm$ 1          | 88 $\pm$ 9         | 0.15 $\pm$ 0.02 | 0.85 $\pm$ 0.02 |
| V36a/I32a                     | 59.7           | 2.9 $\pm$ 0.5      | 39 $\pm$ 2         | 0.28 $\pm$ 0.02 | 0.72 $\pm$ 0.02 |
| V36b                          | 49.2           | 1.1 $\pm$ 0.2      | 52 $\pm$ 2         | 0.14 $\pm$ 0.86 | 0.86 $\pm$ 0.86 |
| <b>Arctic DMSO, 260 K</b>     |                |                    |                    |                 |                 |
| Carbon                        | $\delta$ (ppm) | $T_{1\rho,a}$ (ms) | $T_{1\rho,b}$ (ms) | $a$             | $b$             |
| F19I32V36a                    | 59.0           | 1.6 $\pm$ 0.3      | 31 $\pm$ 1         | 0.18 $\pm$ 0.01 | 0.82 $\pm$ 0.01 |
| F19b                          | 40.1           | 2.2 $\pm$ 0.4      | 28 $\pm$ 2         | 0.31 $\pm$ 0.03 | 0.69 $\pm$ 0.03 |
| F19R                          | 130.9          | 0.9 $\pm$ 0.1      | 15 $\pm$ 2         | 0.48 $\pm$ 0.03 | 0.52 $\pm$ 0.03 |
| A21a                          | 52.7           | 3 $\pm$ 1          | 27 $\pm$ 4         | 0.35 $\pm$ 0.07 | 0.65 $\pm$ 0.07 |
| I32d                          | 14.7           | 13 $\pm$ 5         | 82 $\pm$ 84        | 0.61 $\pm$ 0.25 | 0.39 $\pm$ 0.25 |
| L34a                          | 55.0           | 3.0 $\pm$ 0.5      | 34 $\pm$ 3         | 0.31 $\pm$ 0.03 | 0.69 $\pm$ 0.03 |
| L34d2                         | 23.0           | 9 $\pm$ 3          | 60 $\pm$ 38        | 0.58 $\pm$ 0.18 | 0.42 $\pm$ 0.18 |
| V36a/I32a                     | 59.7           | 2.5 $\pm$ 0.5      | 30 $\pm$ 2         | 0.26 $\pm$ 0.03 | 0.74 $\pm$ 0.03 |
| V36b                          | 49.2           | 2.4 $\pm$ 0.3      | 40 $\pm$ 2         | 0.28 $\pm$ 0.01 | 0.72 $\pm$ 0.01 |
| <b>Wild type, DMSO, 298 K</b> |                |                    |                    |                 |                 |
| Carbon                        | $\delta$ (ppm) | $T_{1\rho,a}$ (ms) | $T_{1\rho,b}$ (ms) | $a$             | $b$             |
| F19a                          | 56.0           | 1.7 $\pm$ 0.4      | 14 $\pm$ 1         | 0.27 $\pm$ 0.04 | 0.73 $\pm$ 0.04 |
| F19b                          | 42.9           | 3.0 $\pm$ 0.5      | 25 $\pm$ 4         | 0.53 $\pm$ 0.06 | 0.47 $\pm$ 0.06 |
| F19R                          | 132.6          | 1.2 $\pm$ 0.2      | 14 $\pm$ 3         | 0.66 $\pm$ 0.05 | 0.34 $\pm$ 0.05 |
| A21a                          | 49.9           | 4 $\pm$ 1          | 23 $\pm$ 3         | 0.37 $\pm$ 0.09 | 0.63 $\pm$ 0.09 |
| I32d                          | 15.2           | 6 $\pm$ 1          | 34 $\pm$ 8         | 0.56 $\pm$ 0.09 | 0.44 $\pm$ 0.09 |
| L34a                          | 54.5           | 2.5 $\pm$ 0.6      | 52 $\pm$ 4         | 0.22 $\pm$ 0.02 | 0.78 $\pm$ 0.02 |
| L34d2/V36g2                   | 24.4           | 3.3 $\pm$ 0.3      | 44 $\pm$ 3         | 0.41 $\pm$ 0.02 | 0.59 $\pm$ 0.02 |
| V36a                          | 60.8           | 3.2 $\pm$ 0.4      | 38 $\pm$ 4         | 0.45 $\pm$ 0.03 | 0.55 $\pm$ 0.03 |
| V36b                          | 33.5           | 1.8 $\pm$ 0.4      | 35 $\pm$ 5         | 0.46 $\pm$ 0.04 | 0.54 $\pm$ 0.04 |
| <b>Wild type, DMSO, 260 K</b> |                |                    |                    |                 |                 |
| Carbon                        | $\delta$ (ppm) | $T_{1\rho,a}$ (ms) | $T_{1\rho,b}$ (ms) | $a$             | $b$             |
| F19a                          | 56.0           | 1.6 $\pm$ 0.5      | 30 $\pm$ 2         | 0.18 $\pm$ 0.02 | 0.82 $\pm$ 0.02 |
| F19b                          | 42.9           | 5.1 $\pm$ 0.8      | 45 $\pm$ 4         | 0.36 $\pm$ 0.04 | 0.64 $\pm$ 0.04 |
| F19R                          | 132.6          | 2.9 $\pm$ 0.2      | 41 $\pm$ 8         | 0.65 $\pm$ 0.02 | 0.35 $\pm$ 0.02 |
| A21a                          | 49.9           | 5 $\pm$ 2          | 40 $\pm$ 6         | 0.24 $\pm$ 0.07 | 0.76 $\pm$ 0.07 |
| I32d                          | 15.2           |                    | 61 $\pm$ 5         |                 | 1               |
| L34a                          | 54.5           | 0.7 $\pm$ 0.2      | 89 $\pm$ 6         | 0.14 $\pm$ 0.01 | 0.86 $\pm$ 0.01 |
| L34d2/V36g2                   | 24.4           |                    | 81 $\pm$ 2         |                 | 1               |
| V36a                          | 60.8           | 2.2 $\pm$ 0.4      | 37 $\pm$ 3         | 0.31 $\pm$ 0.03 | 0.69 $\pm$ 0.03 |
| V36b                          | 33.5           | 6 $\pm$ 1          | 54 $\pm$ 11        | 0.50 $\pm$ 0.06 | 0.50 $\pm$ 0.06 |
| <b>Osaka DMSO, 298 K</b>      |                |                    |                    |                 |                 |

| Carbon    | $\delta$ (ppm) | $T_{1\rho,a}$ (ms) | $T_{1\rho,b}$ (ms) | a         | b         |
|-----------|----------------|--------------------|--------------------|-----------|-----------|
| F19a      | 55.6           | 4.2±0.4            | 26±2               | 0.47±0.03 | 0.53±0.03 |
| F19b      | 42.6           | 3.6±0.3            | 29±2               | 0.48±0.02 | 0.52±0.02 |
| F19R      | 131.5          | 0.7±0.1            | 13±1               | 0.42±0.03 | 0.58±0.03 |
| A21a      | 49.2           |                    | 28±1               |           | 1         |
| I32d      | 14.5           | 3±4                | 36±3               | 0.25±0.04 | 0.75±0.04 |
| L34a      | 54.3           | 6.2±0.7            | 39±4               | 0.48±0.04 | 0.52±0.04 |
| L34d2     | 24.9           | 1.2±0.3            | 49±2               | 0.17±0.01 | 0.83±0.01 |
| V36a/I32a | 58.6           | 4±1                | 51±3               | 0.16±0.02 | 0.84±0.02 |
| V36b      | 36.2           | 2±1                | 60±4               | 0.11±0.02 | 0.89±0.02 |

**Osaka DMSO, 260 K**

| Carbon    | $\delta$ (ppm) | $T_{1\rho,a}$ (ms) | $T_{1\rho,b}$ (ms) | a         | b         |
|-----------|----------------|--------------------|--------------------|-----------|-----------|
| F19a      | 55.6           | 3.2±0.9            | 38±2               | 0.20±0.03 | 0.80±0.03 |
| F19b      | 42.6           | 2.1±0.4            | 31±1               | 0.18±0.02 | 0.82±0.02 |
| F19R      | 131.5          | 2.0±0.3            | 32±2               | 0.32±0.02 | 0.68±0.03 |
| A21a      | 49.2           |                    | 30±1               |           | 1         |
| I32d      | 14.5           | 3.0±0.9            | 27±3               | 0.33±0.06 | 0.67±0.06 |
| L34a      | 54.3           | 7±1                | 41±3               | 0.24±0.04 | 0.76±0.04 |
| L34d2     | 24.9           | 0.8±0.2            | 35±2               | 0.19±0.02 | 0.81±0.02 |
| V36a/I32a | 58.6           | 6±2                | 49±3               | 0.17±0.03 | 0.83±0.03 |
| V36b      | 36.2           | 2.0±0.8            | 47±3               | 0.13±0.02 | 0.87±0.02 |

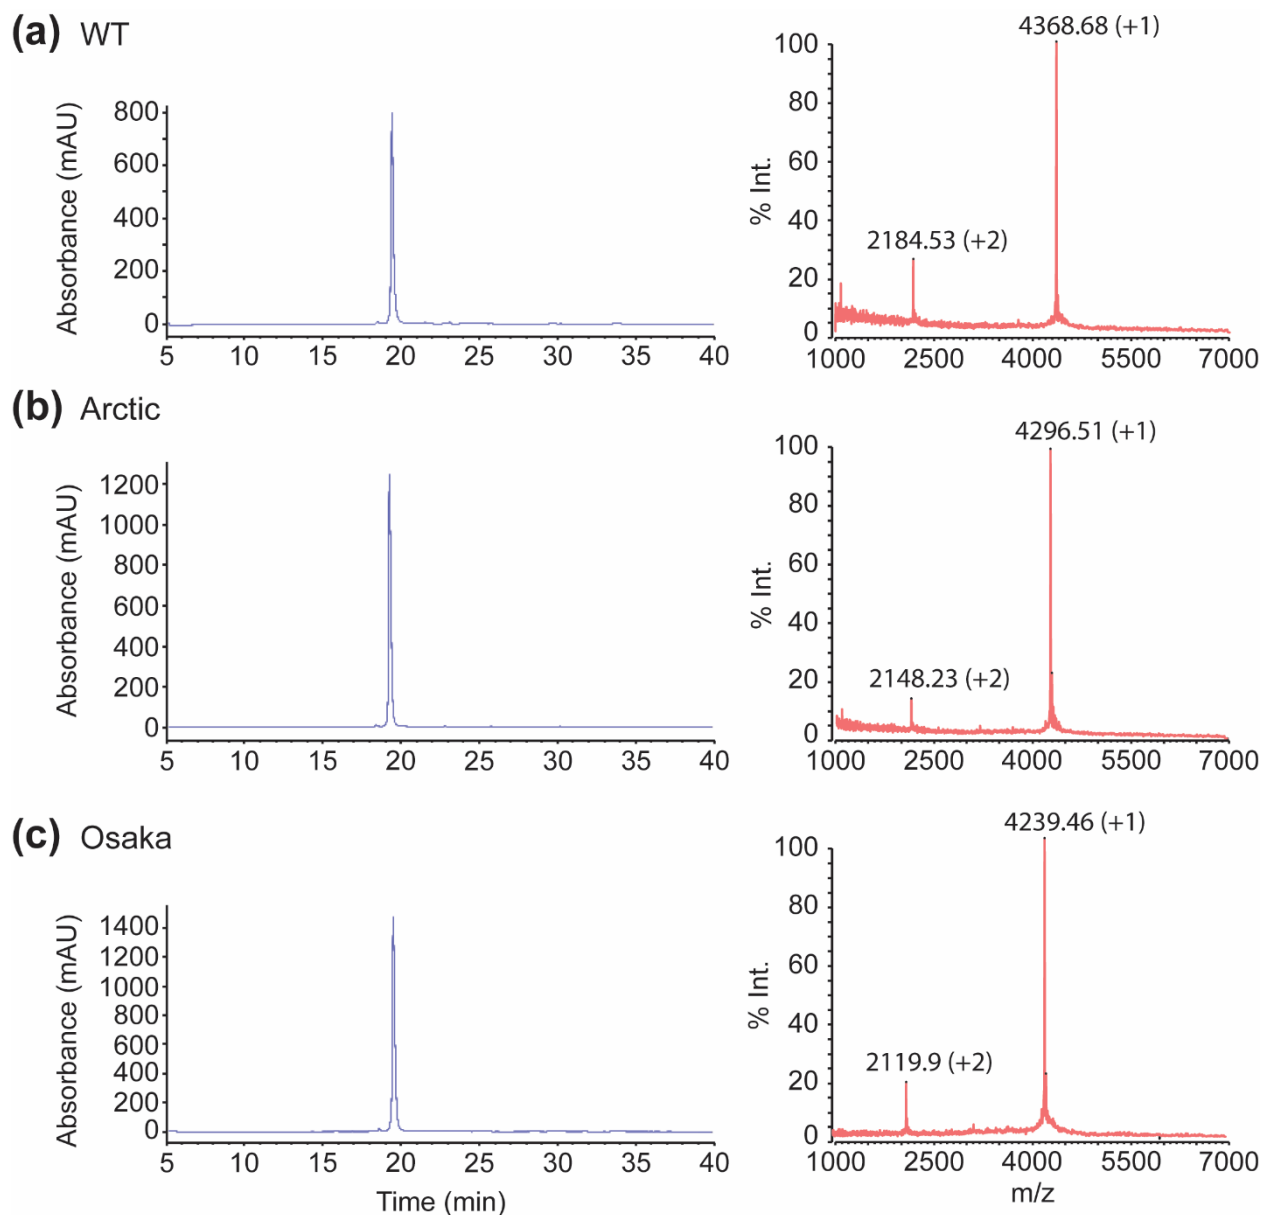

**Figure S1.** HPLC profiles and MALDI spectra of isotopically labeled Aβ. (a) WT Aβ40; (b) Arctic E22G Aβ40; (c) Osaka E22Δ Aβ40. The purity of all the peptides were >95% based upon HPLC by absorbance at 220 nm. Typically 15-20 mg of the purified peptides were obtained after extensive HPLC of the crude product (app. 250 mg, 55% crude yield) in 0.1 mmol scale synthesis.



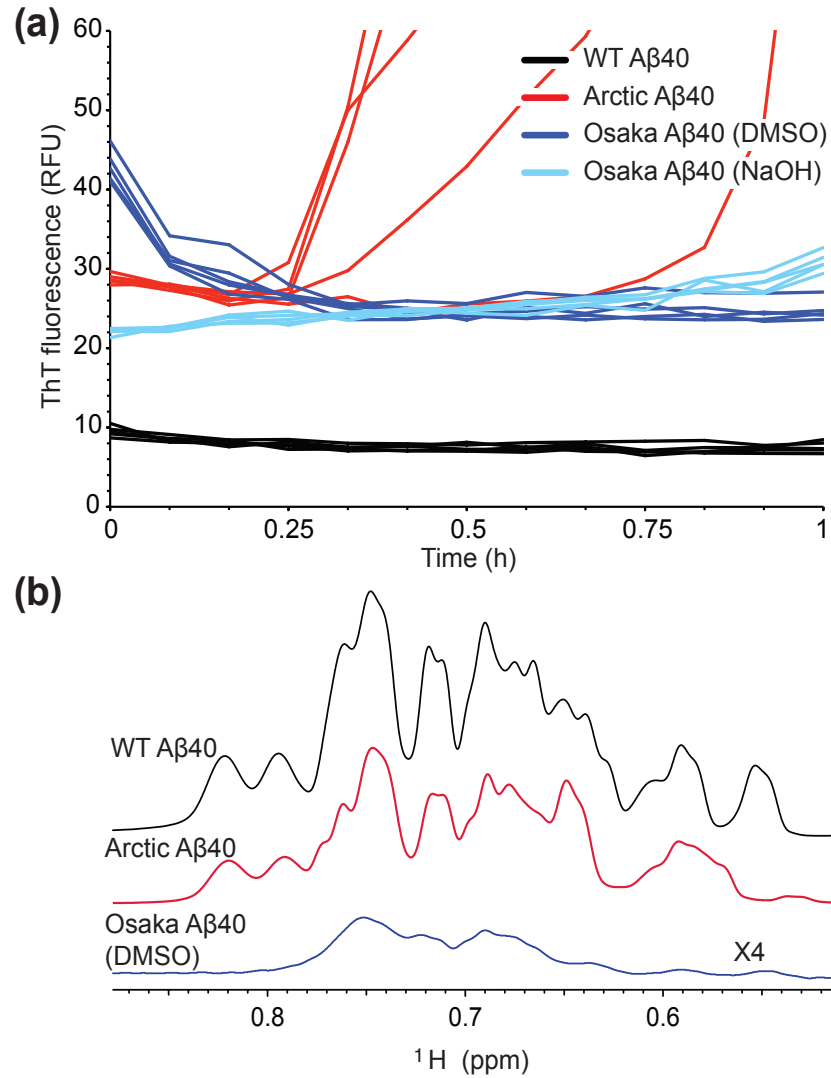

**Figure S2.** Early time points of fibrillization. (a) Kinetics of fibril formation (0.2 mg/ml in 10 mM sodium phosphate buffer, pH 7.2) were measured by the amyloid-binding dye ThT (10  $\mu$ M). n=5 (b) Formation of insoluble fibrils by WT, Arctic, and Osaka A $\beta$ 40 peptides (0.2 mg/ml) was observed by disappearance of methyl group signals in  $^1$ H solution NMR spectra, which were recorded 5 minutes after sample preparation. The starting concentrations for all samples were 100  $\mu$ M. The spectra were recorded with 256 scans at 295 K on a Bruker Avance II 900 MHz spectrometer.

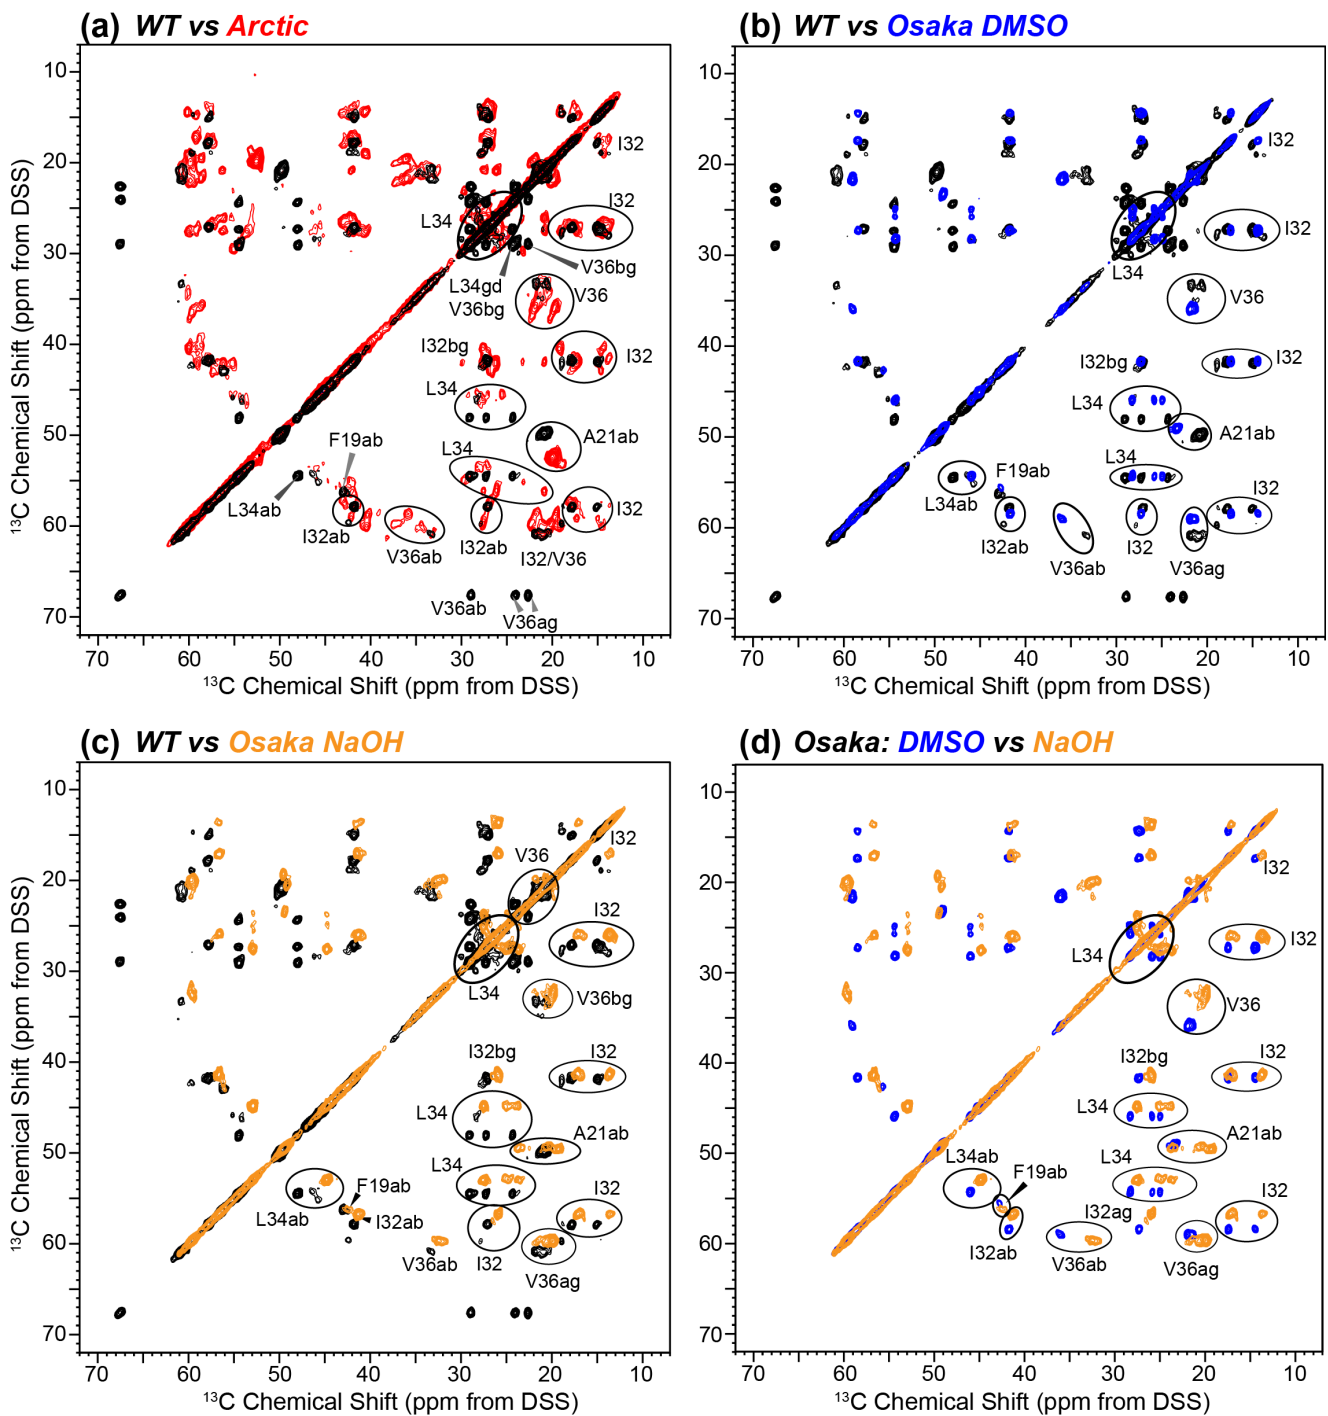

**Figure S3.** Pairwise overlays of 50 ms 2D  $^{13}\text{C}$ - $^{13}\text{C}$  DARR spectra of four A $\beta$ 40 fibril samples indicate chemical shift differences. The WT, Arctic, Osaka DMSO and Osaka NaOH spectra are shown in black, red, blue and orange, respectively. (a) WT and Arctic A $\beta$ 40 spectra. (b) WT and Osaka DMSO A $\beta$ 40 spectra. (c) WT and Osaka NaOH A $\beta$ 40 spectra. (d) Osaka DMSO and Osaka NaOH spectra.

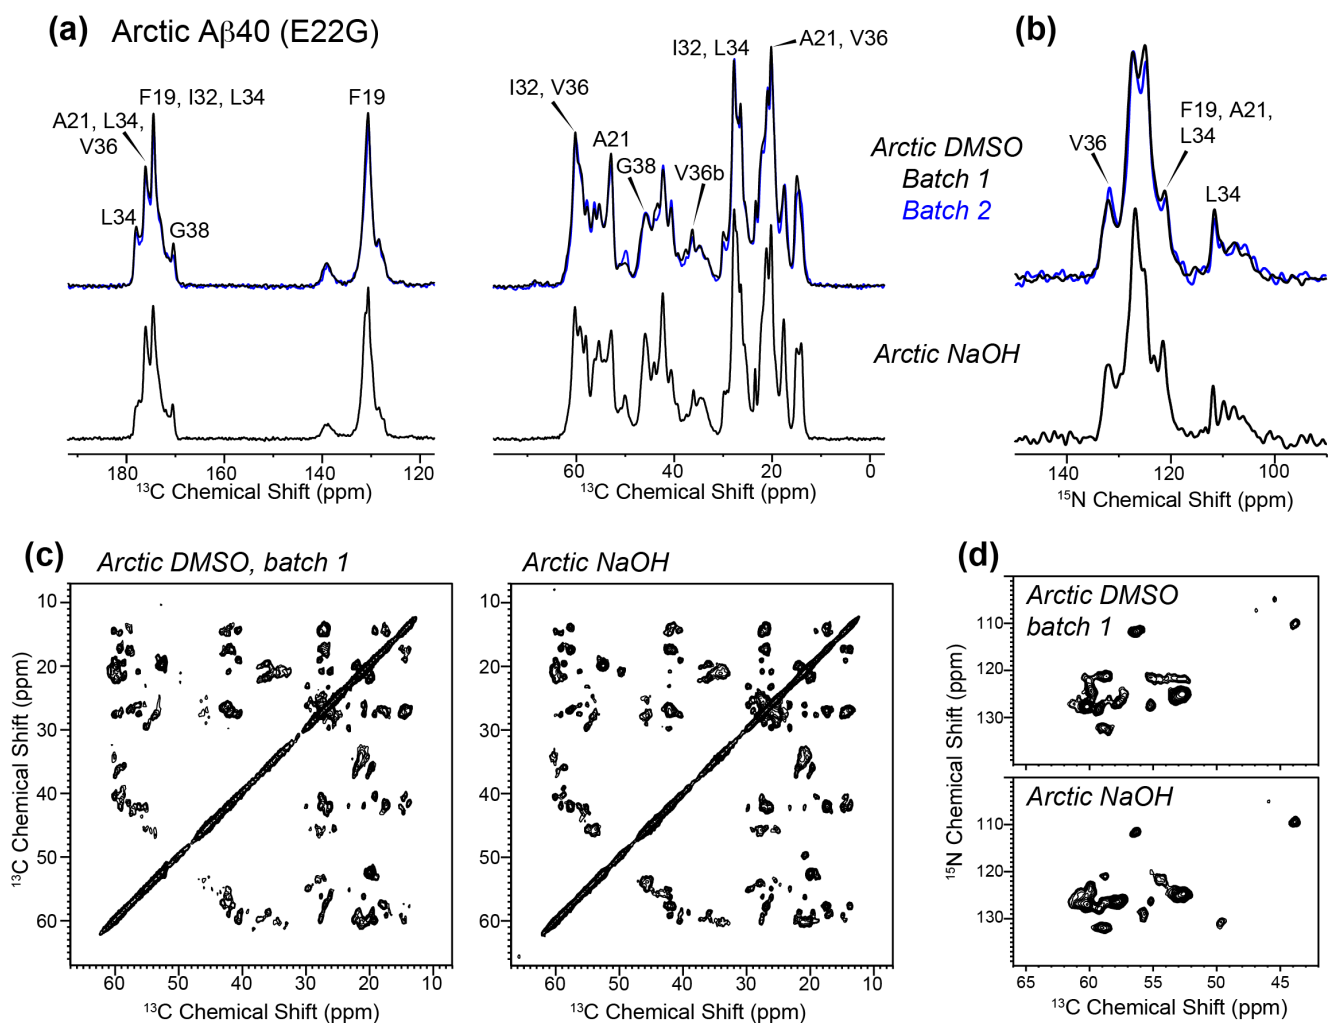

**Figure S4.** Batch-to-batch peptide reproducibility and solvent independence of the Arctic A $\beta$ 40 fibrils. (a) 1D  $^{13}\text{C}$  CP spectra and (b) 1D  $^{15}\text{N}$  CP spectra of Arctic A $\beta$ 40 fibrils prepared in DMSO (top trace) and NaOH (bottom trace). For the DMSO condition, two batches of peptides were synthesized and fibrilized, with no observable spectral differences, confirming that the molecular structural polymorphism is reproducible and intrinsic to this sequence. (c) 50 ms 2D  $^{13}\text{C}$ - $^{13}\text{C}$  and (d) 2D  $^{15}\text{N}$ - $^{13}\text{C}$  correlation spectra of Arctic DMSO (batch 1) and Arctic NaOH fibrils. The two spectra are similar, indicating that the solvent condition has little effect on the fibril structure in the case of Arctic A $\beta$ 40, which differs from the behavior of Osaka A $\beta$ 40 fibrils.

(a) Osaka NaOH

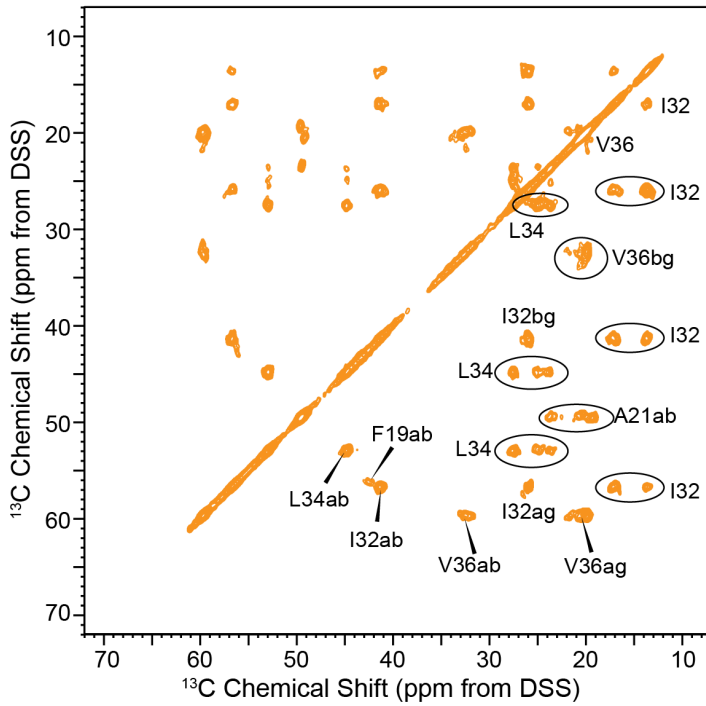

(b) WT vs Osaka NaOH

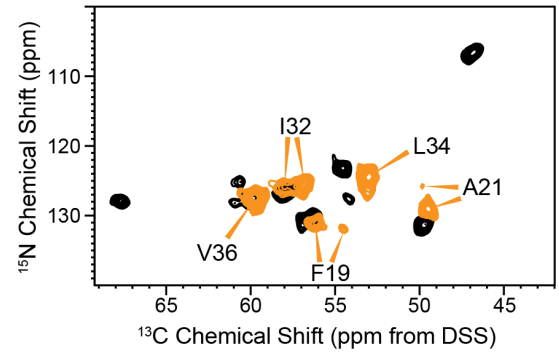

(c) Osaka NaOH

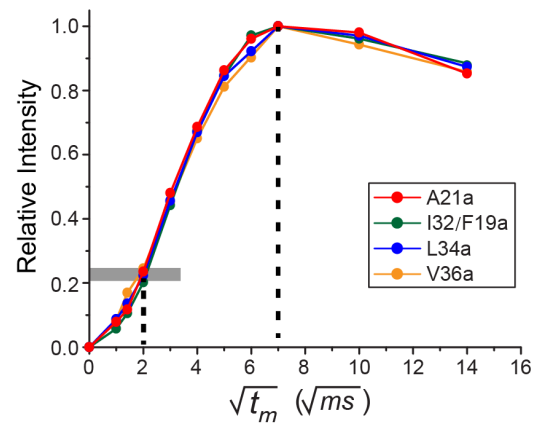

**Figure S5.** Additional NMR data of Osaka NaOH A $\beta$ 40 fibrils. (a) 50 ms 2D  $^{13}\text{C}$ - $^{13}\text{C}$  DARR spectrum with 50 ms mixing. (b) 2D  $^{15}\text{N}$ - $^{13}\text{C}$  correlation spectrum. (c) Water-to-protein  $^1\text{H}$  spin diffusion buildup curves.

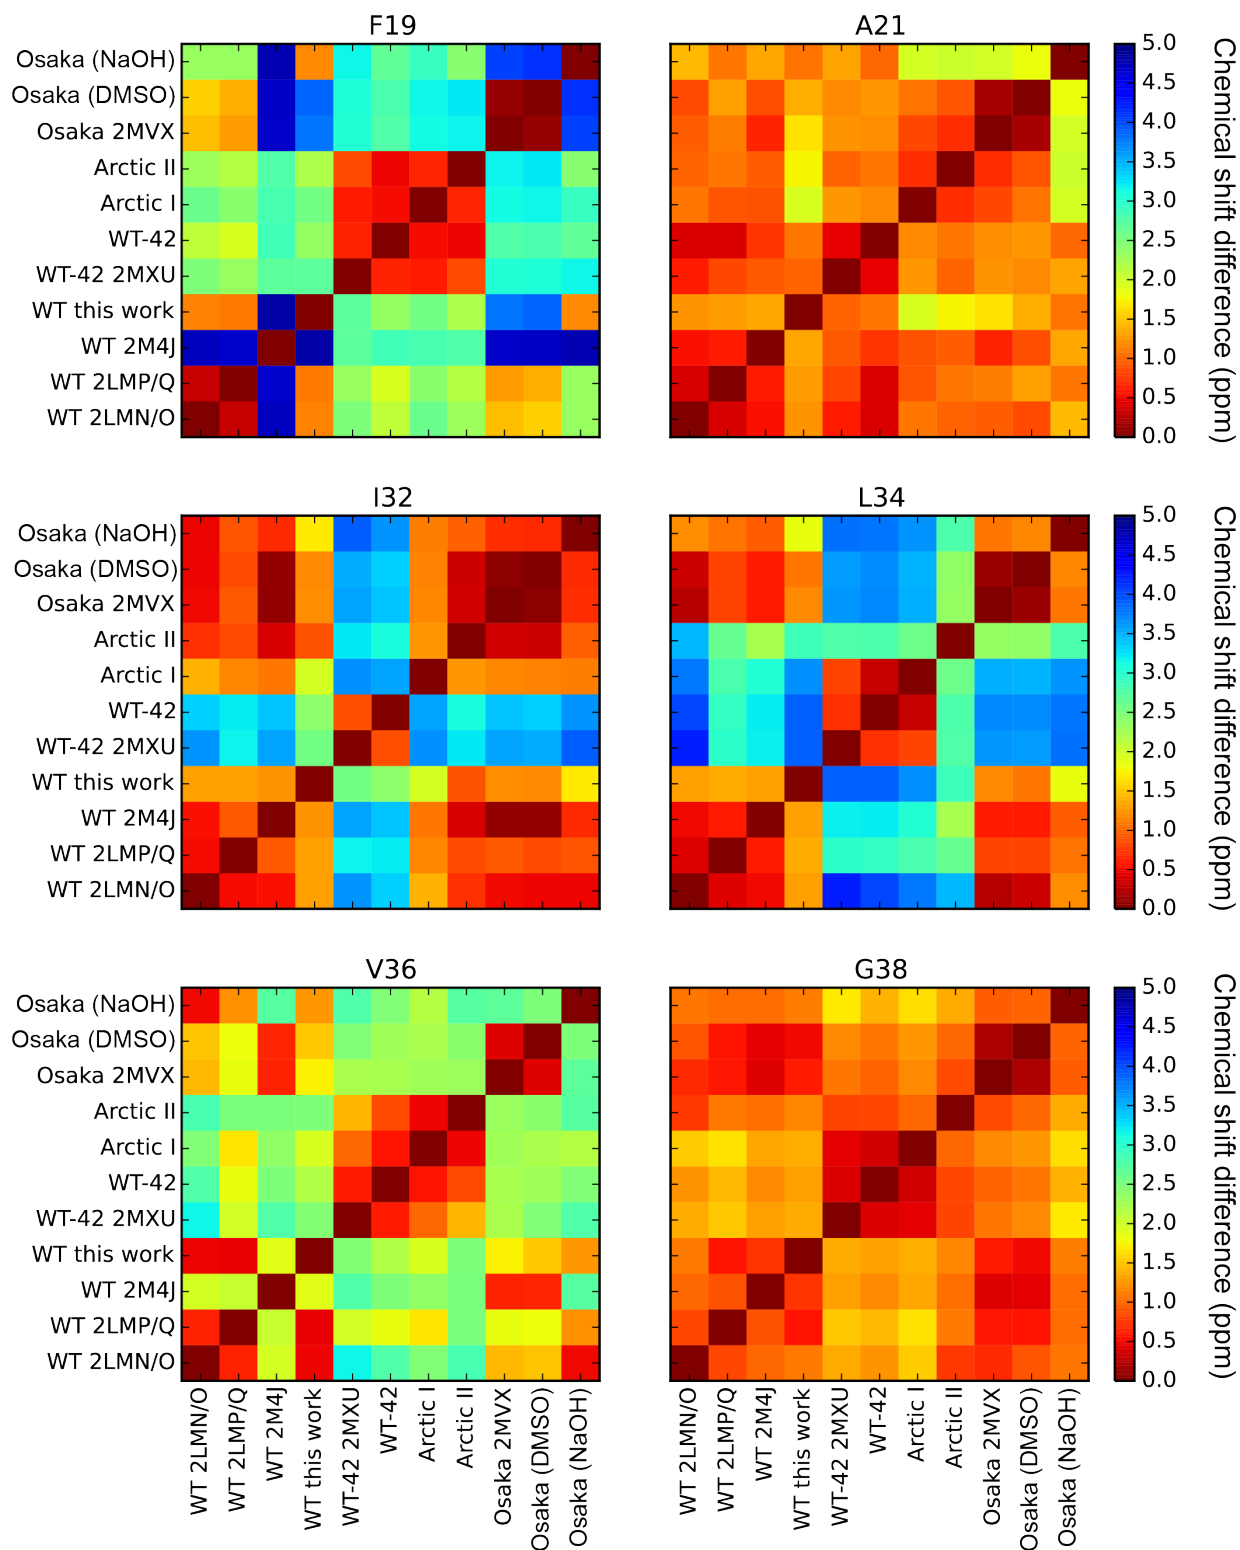

**Figure S6.** Residue-specific heat maps representing the pairwise Pearson correlation coefficients between the chemical shifts of different Aβ strains studied here and reported in the literature.

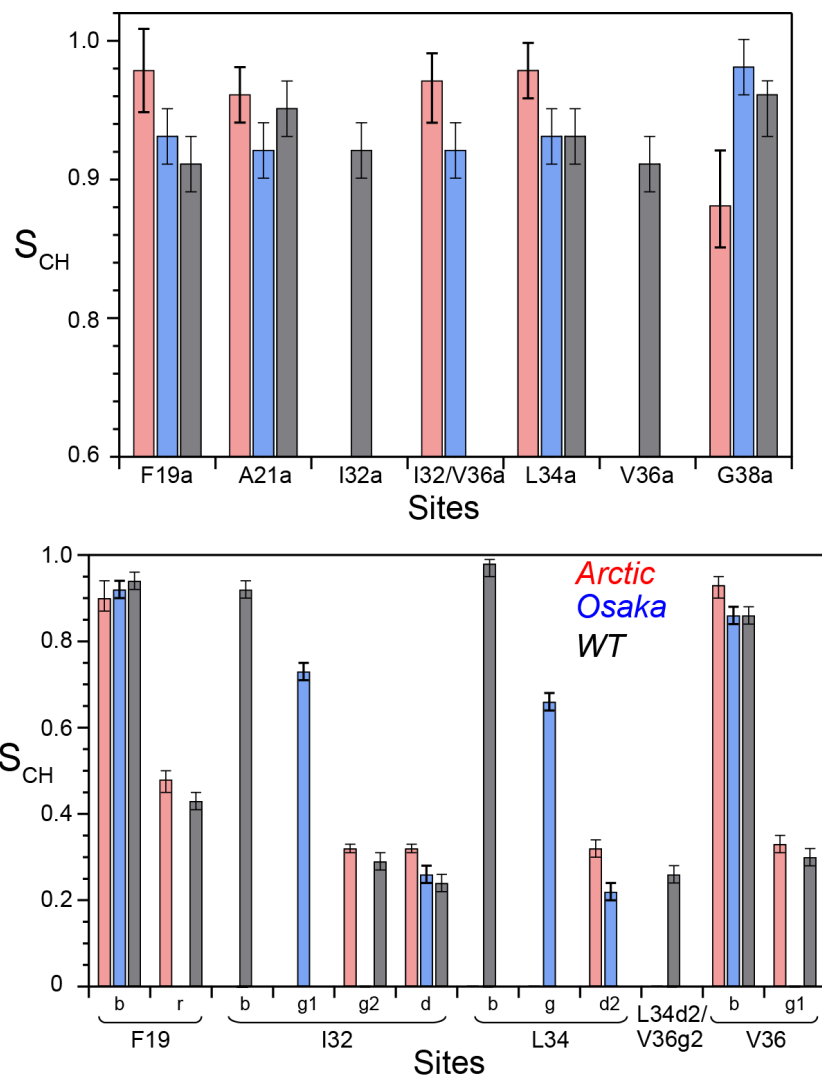

**Figure S7.** C-H dipolar order parameters  $S_{CH}$  of Arctic, WT and Osaka DMSO A $\beta$  40 fibrils for backbone  $C\alpha$  (top) and sidechain (bottom) carbons.

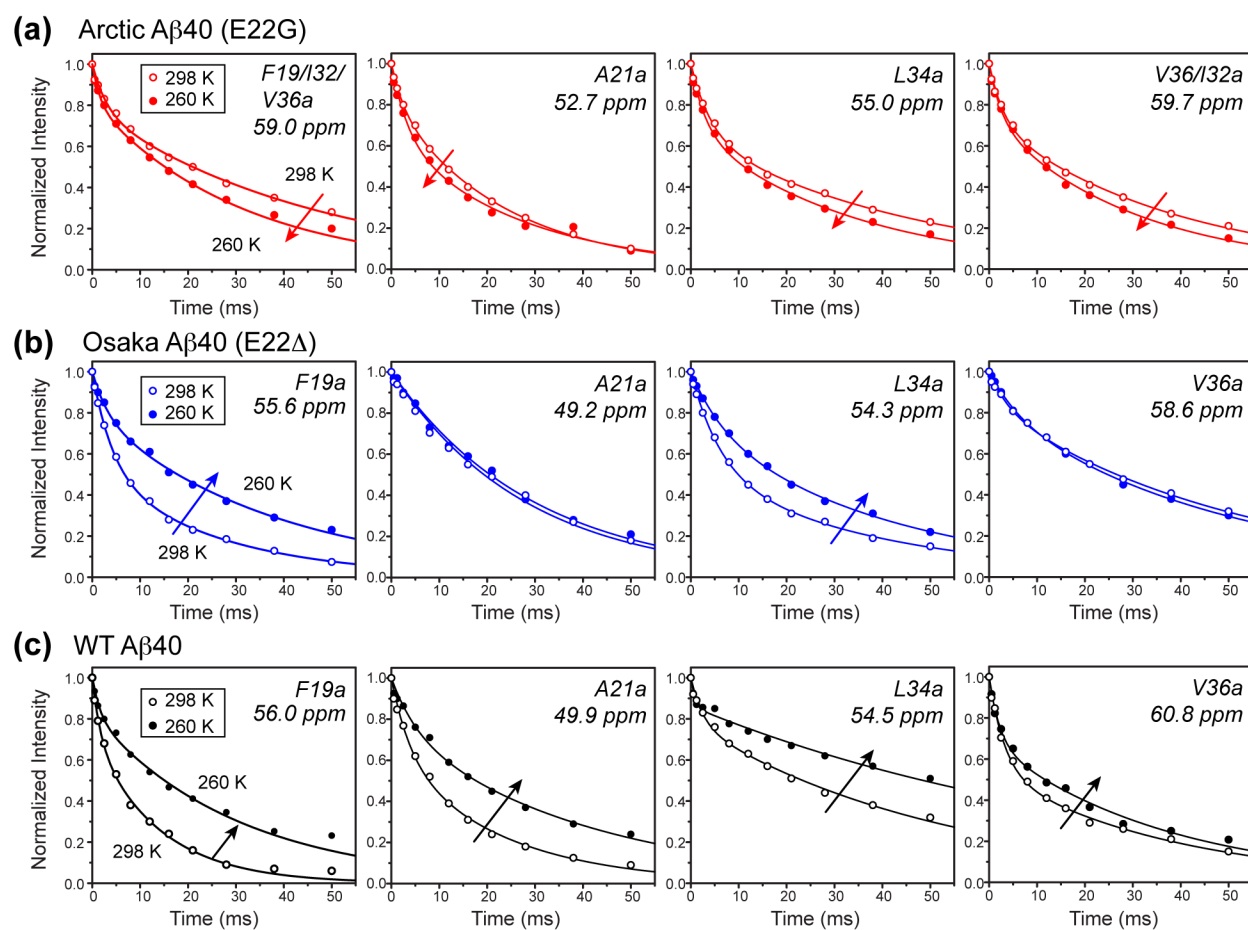

**Figure S8.** Temperature dependence of  $^1\text{H}$   $T_{1\rho}$  relaxation times of backbone  $\text{Ca}$  sites in (a) Arctic, (b) Osaka DMSO, and (c) WT A $\beta$ 40. Both Arctic and Osaka A $\beta$ 40 have similar  $^1\text{H}$   $T_{1\rho}$  values between 298 K and 260 K, while the WT peptide shows much longer  $T_{1\rho}$  with decreasing temperature. This indicates that at ambient temperature, the microsecond motions are slower in WT A $\beta$ 40 than in Arctic and Osaka A $\beta$ 40.

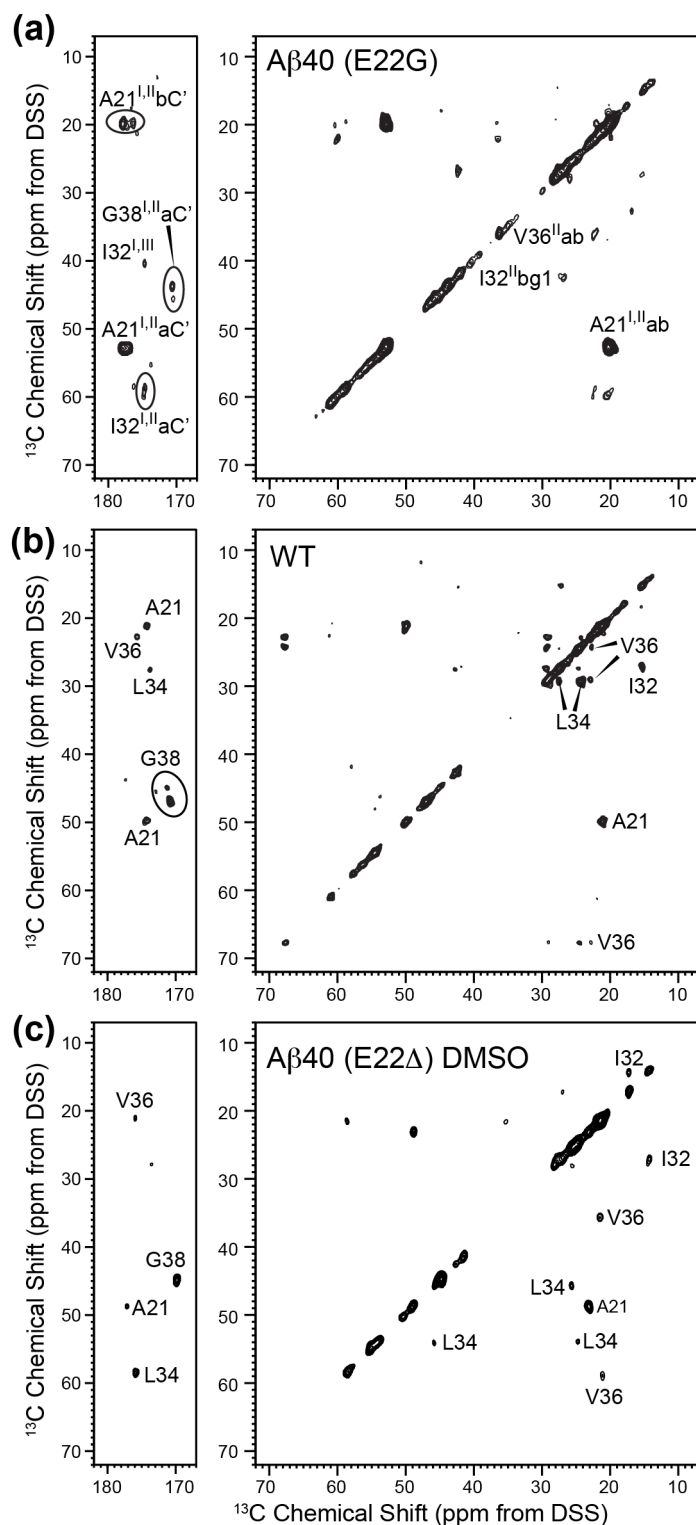

**Figure S9.** Water-edited 2D  $^{13}\text{C}$ - $^{13}\text{C}$  DARR spectra of (a) Arctic  $\text{A}\beta$ , (b) wild type  $\text{A}\beta$ 40, and (c) Osaka  $\text{A}\beta$ 40. The spectra were measured at 277 K under 10.5 kHz. The  $^1\text{H}$   $T_2$  filter time was 600  $\mu\text{s}$  and the  $^1\text{H}$  spin diffusion mixing period was 4 ms. All spectra are plotted using Topspin parameters of lev0 = 4, toplev = 90 and nlev = 16.



## References

- (1) Petkova, A. T.; Yau, W. M.; Tycko, R. *Biochemistry* **2006**, *45*, 498-512.
- (2) Paravastu, A. K.; Leapman, R. D.; Yau, W. M.; Tycko, R. *Proc. Natl. Acad. Sci. USA* **2008**, *105*, 18349-18354.
- (3) Lu, J. X.; Qiang, W.; Yau, W. M.; Schwieters, C. D.; Meredith, S. C.; Tycko, R. *Cell* **2013**, *154*, 1257-1268.
- (4) Colvin, M. T.; Silvers, R.; Frohm, B.; Su, Y.; Linse, S.; Griffin, R. G. *J. Am. Chem. Soc.* **2015**, *137*, 7509-7518.
- (5) Xiao, Y. L.; Ma, B. Y.; McElheny, D.; Parthasarathy, S.; Long, F.; Hoshi, M.; Nussinov, R.; Ishii, Y. *Nat. Struct. Mol. Biol.* **2015**, *22*, 499-U497.
- (6) Schutz, A. K.; Vagt, T.; Huber, M.; Ovchinnikova, O. Y.; Cadalbert, R.; Wall, J.; Guntert, P.; Bockmann, A.; Glockshuber, R.; Meier, B. H. *Angew. Chem. Int. Ed. Engl.* **2015**, *54*, 331-335.
